# Supplementary material
Source: MDPI journal article supplement (https://www.mdpi.com/2311-5637/10/3/145)
Supplement: s1 [file s1]

Archive with 2 entries (2 files):
- Supplementary Table.pdf
- Supplementary-Figure.pdf
