# Supplementary material
Source: MDPI journal article supplement (https://www.mdpi.com/2311-5637/10/3/145)
Supplement: s1 [file s1]

**Table S1.** Primers used to detect the potential binding related genes in *L. plantarum* strains.

| Functions            | Genes       | Predicted function               | For Primer<br>(5'–3')    | Rev Primer<br>(3'–5')        | Melting<br>Temperature (°C) |
|----------------------|-------------|----------------------------------|--------------------------|------------------------------|-----------------------------|
| Binding related gene | <i>apf</i>  | Aggregation- promoting factors   | YAGCCAACAAGTTCTTGTTAGCA  | GAATCTGGTGGTTCATAYWCAGC      | 53.0                        |
|                      | <i>cbs</i>  | Collagen binding S-layer         | TTGGTACTGACAAGGTWACTCGTT | TGTCAGCGTTGATGWA<br>CTTGC    | 57.2                        |
|                      | <i>Cnb</i>  | Collagen binding protein         | CGTGGAGAAGTCGGTGGATG     | CATTGCTATGACGCCG<br>GAAC     | 60.1                        |
|                      | <i>fpb</i>  | Fibronectin-binding protein      | WGCYAAAYCGGAAGAATCACC    | ACCGAGTTCGTRYCGG<br>GTCR     | 58.0                        |
|                      | <i>gtf</i>  | Glucan synthase                  | ACACGCAGGGCGTTATTTTG     | GCCACCTTCAACGTTC<br>GTA      | 58.0                        |
|                      | <i>mapA</i> | Mucus adhesion promoting protein | TGGATTCTGCTTGAGGTAAG     | GACTAGTAATAACGCG<br>ACCG     | 50.0                        |
|                      | <i>msa</i>  | Mannose-specific adhesion        | GCAAGACGCTATCGGGTTCA     | TAACGCCTGCGACTCT<br>CCTG     | 59.8                        |
|                      | <i>mub1</i> | Mucin-binding protein            | GTAGTTACTCAGTGACGATCAATG | TAATTGTAAAGGTATA<br>ATCGGAGG | 50.0                        |
|                      | <i>mub2</i> | Mucin-binding protein            | ACGCGTATTGCGGGTAATGA     | CGCCCCTGAAGTGGG<br>ATGT      | 60.0                        |
|                      | <i>slp</i>  | Surface layer protein            | TTGCAGATCCTGTTGTTCCA     | TGTACTTGCCAGTTGC<br>CTTG     | 59.9                        |

**Table S2.** Changes in color of Nham before (t = 0h) and after (t = 96h) fermentation.

| Samples  | Time     | $L^*$                     | $a^*$                     | $b^*$                    | DE   |
|----------|----------|---------------------------|---------------------------|--------------------------|------|
| Nham-NF  | t = 0 h  | 45.20 ± 2.27 <sup>b</sup> | 11.50 ± 1.79 <sup>a</sup> | 8.89 ± 0.27 <sup>a</sup> | -    |
|          | t = 96 h | 51.07 ± 0.85 <sup>a</sup> | 12.03 ± 0.75 <sup>a</sup> | 7.48 ± 0.50 <sup>b</sup> |      |
| Nham-Lp4 | t = 0 h  | 44.76 ± 0.24 <sup>b</sup> | 13.34 ± 1.69 <sup>a</sup> | 8.03 ± 0.87 <sup>a</sup> | 1.63 |
|          | t = 96 h | 52.07 ± 0.88 <sup>a</sup> | 10.83 ± 0.49 <sup>b</sup> | 6.95 ± 0.13 <sup>b</sup> |      |
| Nham-Lp6 | t = 0 h  | 44.70 ± 1.23 <sup>b</sup> | 10.27 ± 0.31 <sup>b</sup> | 7.41 ± 0.03 <sup>a</sup> | 1.02 |
|          | t = 96 h | 52.00 ± 1.90 <sup>a</sup> | 11.87 ± 0.78 <sup>a</sup> | 7.09 ± 0.62 <sup>a</sup> |      |

The values are mean ± standard deviation of triplicate determinations. Significant differences were analyzed by one-way ANOVA with Duncan's multiple range test. Different lowercase letters indicate significant differences between the fermentation times of the same Nham sample ( $p \leq 0.05$ ). No significant difference in  $L^*$ ,  $a^*$  and  $b^*$  values were observed among Nham samples at the same fermentation time. DE were calculated based on the  $L^*$ ,  $a^*$  and  $b^*$  values of Nham-NF vs Nham-Lp4 and of Nham-NF vs Nham-Lp6 at 96 h of fermentation.
