# Supplementary material
Source: MDPI journal article supplement (https://www.mdpi.com/2311-5637/10/3/145)
Supplement: s1 [file s1]

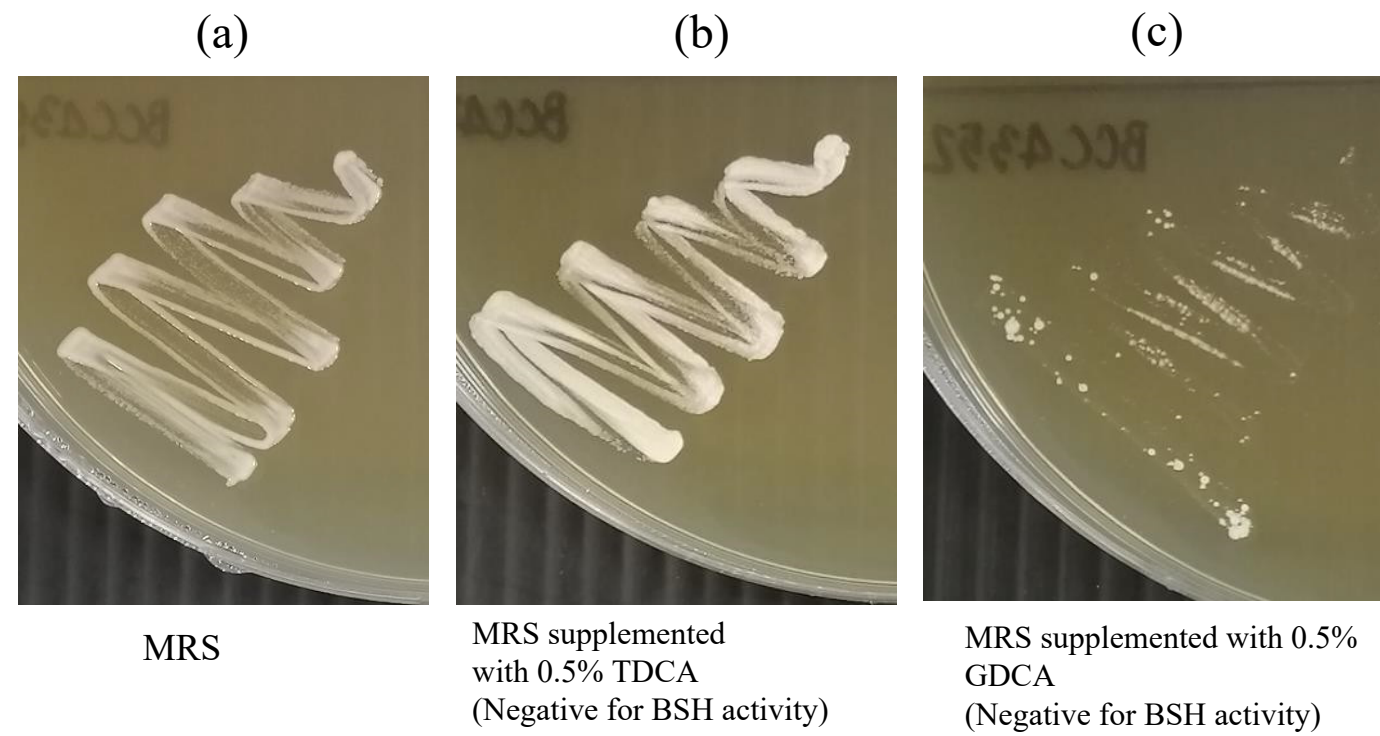

**Figure S1.** Bile salts hydrolase (Bsh) activity assay of *L. plantarum* BCC4352. The strain was grown overnight in MRS broth and streaked onto MRS agar (a), MRS agar supplemented with 0.5% (w/v) taurine conjugates of deoxycholic acid (TDCA) (b), or glycocholic acid conjugates of deoxycholic acid (GDCA) (c). The agar was also supplemented with 0.37 g of CaCl<sub>2</sub> per liter and incubated anaerobically for 48 h. The white precipitates around colonies and the clearing of the medium are indicative of BSH activity.

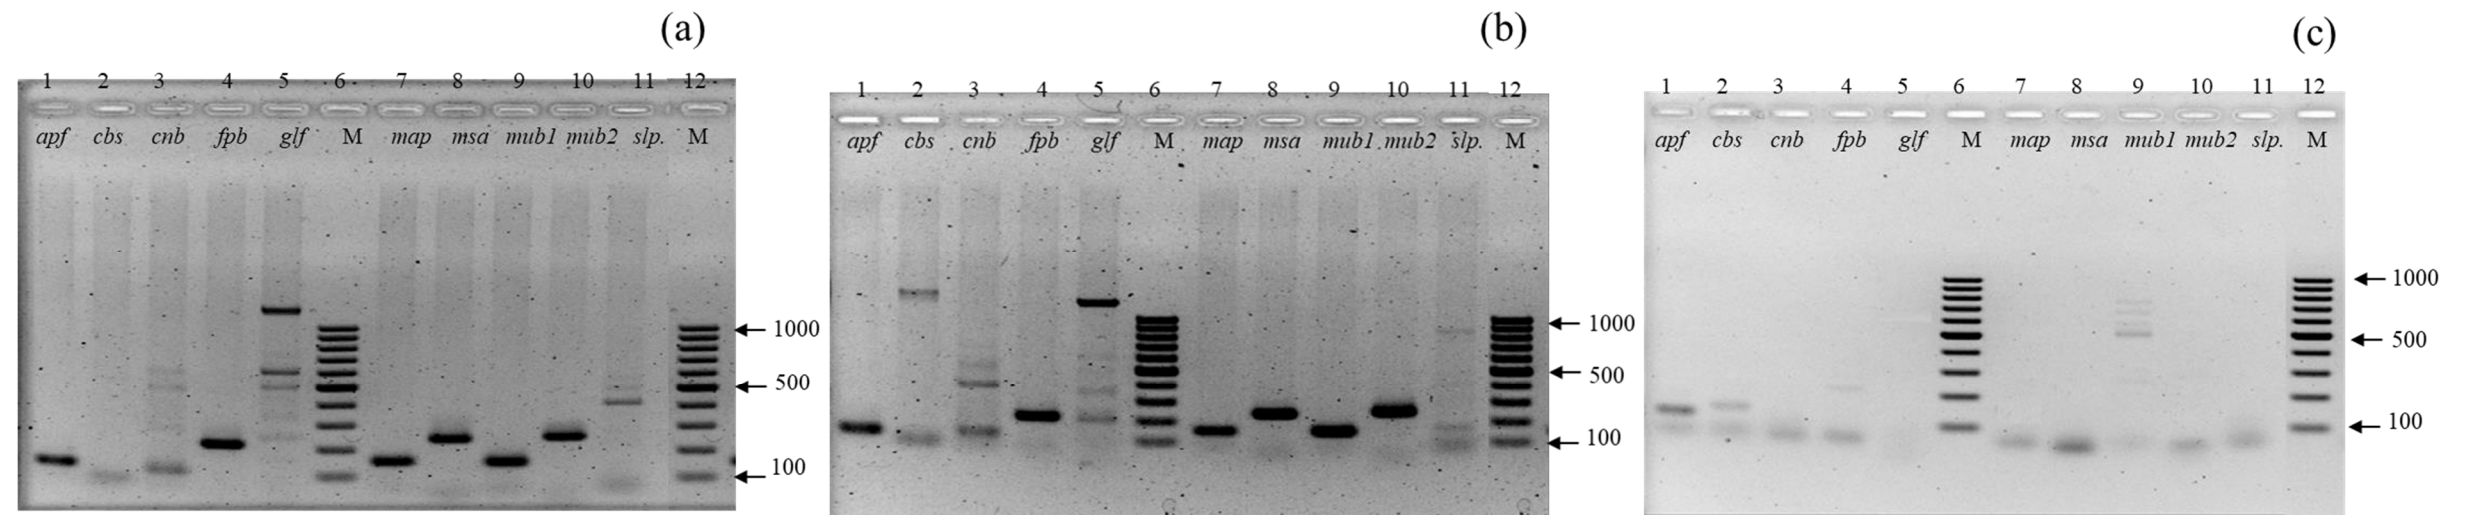

**Figure S2.** Agarose gel electrophoresis of PCR products from *L. plantarum* BCC4352 (a), *L. plantarum* NCIMB8826 (b), and negative control (c), respectively. Lanes 1-5 use primers *apf*, *cbs*, *cnb*, *fpb*, and *map*. Lanes 7-11 use primers *glf*, *mub1*, *msa*, *mub2*, and *slp*. Lane 6 and Lane 12: 100bp Marker.
